# Supplementary material
Source: publisher site journal article supplement (http://content.karger.com/ProdukteDB/miscArchiv/000/142/731/Suppl_Table1.pdf)
Supplement: Supplementary file 1 [file Suppl_Table1.pdf]

## Supplement online Table 1

| <b>gene</b>                     | <b>primer sense</b>             | <b>primer antisense</b>           | <b>product</b> | <b>Taq-Man probe (5': 6FAM; 3: BHQ1)</b> |
|---------------------------------|---------------------------------|-----------------------------------|----------------|------------------------------------------|
| <b>TNF-<math>\alpha</math></b>  | CTC CAC CCA TGT GCT CCT CA      | CTC TGG CAG GGG CTC TTG AT        | 99 bp          | CAC CAT CAG CCG CAT CGC CGT CTC          |
| <b>IP-10</b>                    | GAG CCT ACA GCA GAG GAA CC      | AAG GCA GCA AAT CAG AAT CG        | 68 bp          | TCC AGT CTC AGC ACC ATG AAT CAA A        |
| <b>TLR1</b>                     | AGC AAA GAA ATA GAT TAC ACA TCA | TTA CCT ACA TCA TAC ACT CAC AAT   | 134 bp         |                                          |
| <b>TLR2</b>                     | GCA AGC TGC GGA AGA TAA TG      | CGC AGC TCT CAG ATT TAC CC        | 95 bp          | ATG GAC GAG GCT CAG CGG GAA G            |
| <b>TLR3</b>                     | GAA TGT TTA AAT CTC ACT GC      | AAG TGC TAC TTG CAA TTT AT        | 86 bp          |                                          |
| <b>TLR4</b>                     | ATG AAA TGA GTT GCA GCA GA      | AGC CAT CTG TGT CTC CCT AA        | 89 bp          | AAG TGA TGT TTG ATG GAC CTC TGA ATC T    |
| <b>TLR5</b>                     | GTA CAG AAA CAG CAG TAT TTG AG  | TCT GTT GAG AGA GTT TAT GAA GAA   | 79 bp          |                                          |
| <b>TLR6</b>                     | TTT ACT TGG ATG ATG GTG AAT AGT | AGT TCC CCA GAT GAA ACA TT        | 113 bp         |                                          |
| <b>TLR7</b>                     | CCA TAC TTC TGG CAG TGT CT      | ACT AGG CAG TTG TGT TTT GC        | 113 bp         |                                          |
| <b>TLR8</b>                     | AAG AGC TCC ATC CTC CAG TG      | CCG TGA ATC ATT TTC AGT CAA       | 96 bp          |                                          |
| <b>TLR9</b>                     | GGG ACA ACC ACC ACT TCT AT      | TGA GGT GAG TGT GGA GGT           | 101 bp         | ACT TCT GCC AGG GAC CCA CGG              |
| <b>TLR10</b>                    | CAA GGA TAG GCG TAA ATG TG      | GAA CCT CGA GAC TCT TCA TTT       | 129 bp         |                                          |
| <b><math>\beta</math>-actin</b> | TGC GTG ACA TTA AGG AGA AG      | GTC AGG CAG CTC GTA GCT CT        | 107 bp         | CAC GGC TGC TTC CAG CTC CTC              |
| <b>GAPDH</b>                    | GGG AAG GTG AAG GTC GGA GT      | TCC ACT TTA CCA GAG TTA AAA GCA G | 83 bp          | ACC AGG CGC CCA ATA CGA CCA A            |
